# Supplementary material for: An optical nanofibre-enabled on-chip single-nanoparticle sensor
Source: Royal Society of Chemistry journal article supplement (doi:10.1039/d3lc00499f), 2023-01-01
Supplement: d3lc00499f3.pdf [file d3lc00499f3.pdf]

Supporting Information for

**An optical nanofibre enabled on-chip single nanoparticle sensor**

Ning Liu,<sup>a</sup> Ni Yao,<sup>b</sup> Shipeng Wang,<sup>b</sup> Zhang Zhang,<sup>b</sup> Tanchen Ren,<sup>c</sup> Ying Gao,<sup>c</sup> Xuhao Zhou,<sup>c</sup> Limin Tong<sup>a</sup>  
and Lei Zhang\*<sup>a</sup>

<sup>a</sup> State Key Laboratory of Modern Optical Instrumentation, College of Optical Science and Engineering, Zhejiang University, Hangzhou 310027, China

<sup>b</sup> Research Center for Humanoid Sensing, Zhejiang Lab, Hangzhou 311121, China

<sup>c</sup> Department of Cardiology of the Second Affiliated Hospital, Zhejiang University School of Medicine, Hangzhou 310009, China.

Email: zhang\_lei@zju.edu.cn

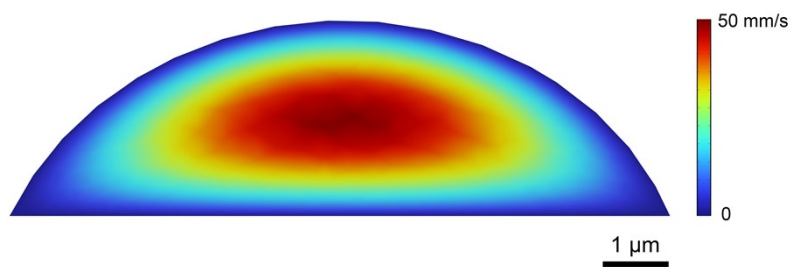

**Figure S1.** Simulation of flow rate distribution in a microchannel (10 μm in width, 3 μm in height).

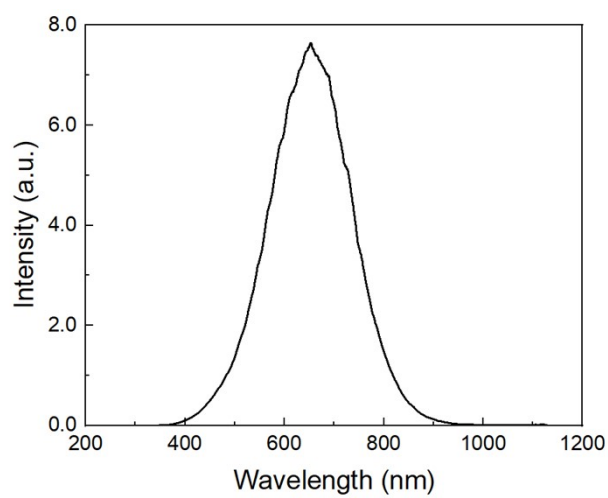

**Figure S2.** Typical transmission spectrum of the nanoparticle sensor with a 700-nm-diameter nanofibre.

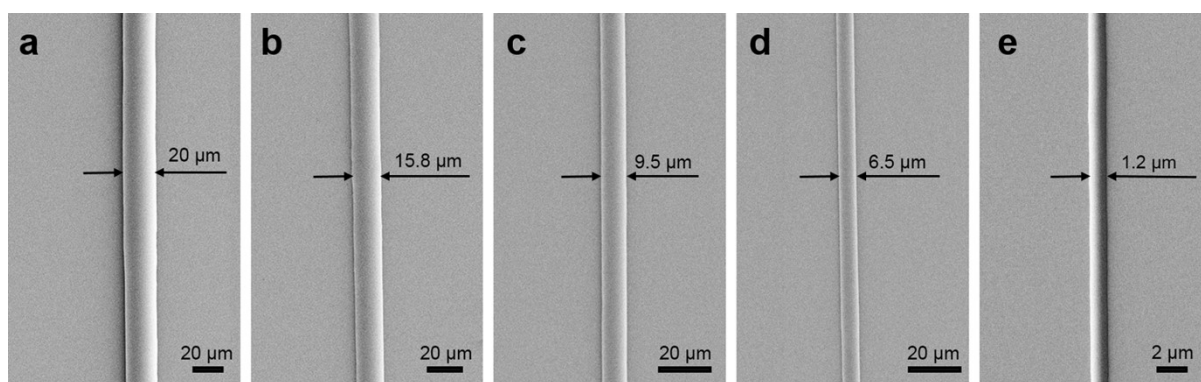

**Figure S3.** (a-e) Scanning electron micrographs of SU-8 microwires with different diameters in a range of 1-20  $\mu\text{m}$ . The diameter of each SU-8 microwire is labelled in the micrograph.

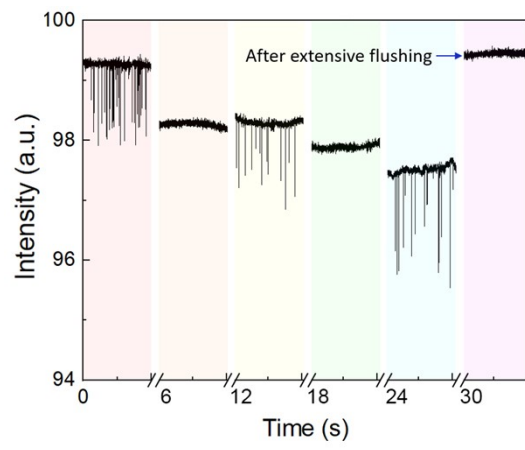

**Fig. S4** Recovery of the transmitted intensity after a set of measurements by extensive flushing.

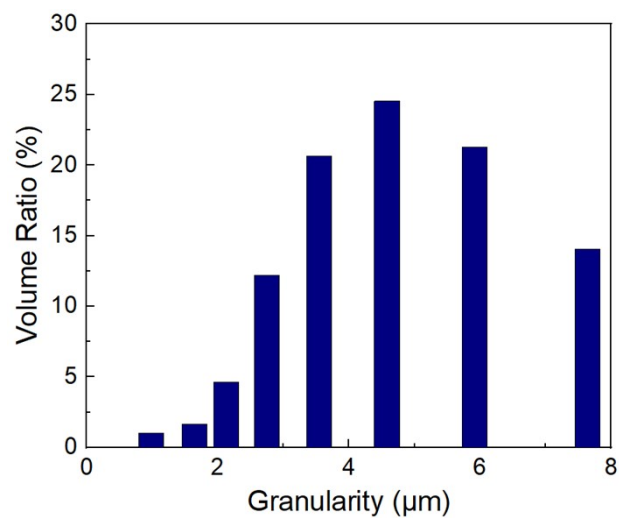

**Fig. S5** The size distribution of the yeasts measured by Mastersizer 3000.

Supplementary Movie S1: Real time detection PS nanoparticle using the optical nanofibre enabled on-chip single nanoparticle sensor.

Supplementary Movie S2: The attached particles can be effectively removed by flushing the channel.
